# Supplementary material
Source: HighWire-hosted journal article supplement (https://svn.smart01.highwire.org/content/svn-2024-003143)
Supplement: inline-supplementary-material-1 [file inline-supplementary-material-1.pdf]

Table S1. Prior AIS characteristics, antithrombotic management and outcomes during follow-up in our study population

| Case Num. | AIS Num. | Pattern of acute findings on DWI                                              | Antithrombotic treatment at time of AIS | Presumed AIS etiology(ies) | Post LAAC OAC use               | Primary outcome and safety outcome during follow – up                       |
|-----------|----------|-------------------------------------------------------------------------------|-----------------------------------------|----------------------------|---------------------------------|-----------------------------------------------------------------------------|
| 1         | 1        | Single cortico-subcortical                                                    | Warfarin                                | AF                         | Kept on OAC                     | No events for 12.2 months                                                   |
|           | 2        | Single cortical                                                               | Apixaban+ASA                            | AF                         |                                 |                                                                             |
| 2         | 1        | Single cortical                                                               | None                                    | AF                         | Kept on OAC                     | No events for 39.2 months                                                   |
|           | 2        | Single subcortical < 15mm (corona radiata infarct)                            | ASA                                     | AF or cSVD                 |                                 |                                                                             |
|           | 3        | Multiple lesions in multiple territories - anterior and posterior circulation | Xarelto+ASA                             | AF                         |                                 |                                                                             |
|           | 4        | Multiple lesions in multiple territories - anterior and posterior circulation | Xarelto                                 | AF                         |                                 |                                                                             |
| 3         | 1        | CRAO                                                                          | Apixaban+ASA                            | AF                         | OAC stopped 6 weeks after LAAC  | No events for 29.1 months                                                   |
| 4         | 1        | Multiple lesions in multiple territories - anterior and posterior circulation | Apixaban+ASA                            | AF                         | OAC stopped 6 months after LAAC | No events for 23.9 months                                                   |
| 5         | 1        | Single subcortical $\geq$ 15 mm                                               | Rivaroxaban                             | AF                         | OAC stopped 6 weeks after LAAC  | No events for 26.1 months                                                   |
|           | 2        | Single subcortical $\geq$ 15 mm                                               | Rivaroxaban                             | AF                         |                                 |                                                                             |
| 6         | 1        | Single subcortical $\geq$ 15 mm                                               | Apixaban+ASA                            | AF                         | OAC stopped 3 months after LAAC | No events for 13.6 months                                                   |
| 7         | 1        | Multiple lesions in multiple territories - anterior and posterior circulation | ASA                                     | AF                         | Kept on OAC                     | No events for 1.5 months                                                    |
|           | 2        | Multiple lesions in multiple territories - unilateral anterior circulation    | Warfarin                                | AF                         |                                 |                                                                             |
| 8         | 1        | BRAO                                                                          | Rivaroxaban                             | AF                         | OAC stopped 6 weeks after LAAC  | No events for 19.6 months                                                   |
| 9         | 1        | Single cortico-subcortical                                                    | Apixaban+ASA                            | AF                         | OAC stopped 6 weeks after LAAC  | No events for 14.6 months                                                   |
| 10        | 1        | One vascular territory - two or more scattered lesions                        | Apixaban+ASA                            | AF                         | Kept on OAC                     | No events for 15.6 months                                                   |
|           | 2        | Multiple lesions in multiple territories - unilateral anterior circulation    | Apixaban+ASA                            | AF                         |                                 |                                                                             |
| 11        | 1        | Single subcortical < 15 mm (pontine infarct)                                  | Aspirin                                 | AF, MGUS or cSVD           | Kept on OAC                     | AIS (single subcortical infarct < 15 mm in corona radiata) 6.3 months after |
|           | 2        | Single cortico-subcortical                                                    | Rivaroxaban                             | AF or MGUS                 |                                 |                                                                             |
|           | 3        | Single cortico-subcortical                                                    | Dabigatran                              | AF or MGUS                 |                                 |                                                                             |
|           | 4        | Multiple lesions in multiple territories - anterior and posterior circulation | Dabigatran+ASA                          | AF or MGUS                 |                                 |                                                                             |

|    |   |                                                                               |                 |                       |                                 |                                                                       |
|----|---|-------------------------------------------------------------------------------|-----------------|-----------------------|---------------------------------|-----------------------------------------------------------------------|
|    | 5 | Single subcortical < 15 mm (internal capsule infarct)                         | Dabigatran+ASA  | AF, MGUS or cSVD      |                                 | LAAC while on apixaban                                                |
| 12 | 1 | Single subcortical $\geq$ 15 mm                                               | Warfarin        | AF                    | OAC stopped 6 weeks after LAAC  | No events for 15.0 months                                             |
|    | 2 | CRAO                                                                          | Warfarin+ASA    | AF                    |                                 |                                                                       |
| 13 | 1 | Multiple lesions in multiple territories - bilateral anterior circulation     | Dabigatran      | AF or Hemochromatosis | Kept on OAC                     | No events for 49.1 months                                             |
| 14 | 1 | One vascular territory - two or more scattered lesions                        | Rivaroxaban     | AF                    | OAC stopped 6 weeks after LAAC  | No events for 17.6 months                                             |
| 15 | 1 | Multiple lesions in multiple territories - anterior and posterior circulation | None            | AF                    | OAC stopped 6 weeks after LAAC  | No events for 46.6 months                                             |
|    | 2 | Single cortico-subcortical                                                    | Warfarin        | AF                    |                                 |                                                                       |
| 16 | 1 | Single subcortical < 15 mm (thalamic infarct)                                 | Warfarin+ASA    | AF or cSVD            | OAC stopped 6 weeks after LAAC  | No events for 17.4 months                                             |
| 17 | 1 | Multiple lesions in multiple territories - bilateral posterior circulation    | Apixaban        | AF                    | On DAPT only after LAAC         | No events for 15.4 months follow – up                                 |
|    | 2 | One vascular territory - two or more scattered lesions                        | Apixaban        | AF                    |                                 |                                                                       |
| 18 | 1 | Single cortico-subcortical                                                    | Warfarin+ASA    | AF                    | Kept on OAC                     | Intracerebral hemorrhage 21.9 months after LAAC while on Apixaban+ASA |
|    | 2 | Single subcortical $\geq$ 15 mm                                               | Warfarin+ASA    | AF                    |                                 |                                                                       |
|    | 3 | Single cortical                                                               | Apixaban+ASA    | AF                    |                                 |                                                                       |
|    | 4 | Single cortico-subcortical                                                    | Apixaban        | AF                    |                                 |                                                                       |
| 19 | 1 | Single cortical                                                               | Aspirin         | AF or HFrEF           | Kept on OAC                     | No events for 6.0 months                                              |
|    | 2 | Single cortico-subcortical                                                    | Apixaban+ASA    | AF or HFrEF           |                                 |                                                                       |
| 20 | 1 | One vascular territory - two or more scattered lesions                        | Apixaban+ASA    | AF                    | Kept on OAC                     | No events for 41.4 months                                             |
| 21 | 1 | Multiple lesions in multiple territories - unilateral anterior circulation    | None            | AF                    | On DAPT only after LAAC         | No events for 16.5 months                                             |
|    | 2 | Multiple lesions in multiple territories - anterior and posterior circulation | Apixaban        | AF                    |                                 |                                                                       |
| 22 | 1 | Single cortico-subcortical                                                    | Warfarin        | AF                    | OAC stopped 6 weeks after LAAC  | No events for 12.0 months                                             |
|    | 2 | Single subcortical < 15 mm (medial medullary infarct)                         | Warfarin        | AF vs cSVD            |                                 |                                                                       |
| 23 | 1 | No MRI available                                                              | Warfarin        | AF                    | OAC stopped 3 months after LAAC | No events for 14.4 months                                             |
|    | 2 | Single cortical                                                               | Dabigatran+ASA  | AF                    |                                 |                                                                       |
| 24 | 1 | No MRI available                                                              | Apixaban        | AF                    | OAC stopped 6 months after LAAC | No events for 35.9 months follow – up                                 |
| 25 | 1 | No MRI available                                                              | Rivaroxaban+ASA | AF                    | OAC stopped 6 weeks after LAAC  | No events for 13.6 months                                             |
| 26 | 1 | Multiple lesions in multiple territories - anterior and posterior circulation | Rivaroxaban     | AF                    | OAC stopped 6 weeks after LAAC  | No events for 21.2 months                                             |
| 27 | 1 | Multiple lesions in multiple territories - bilateral anterior circulation     | Apixaban        | AF                    | OAC stopped 6 weeks after LAAC  | No events for 12.8 months                                             |

|    |   |                                 |          |    |                                |                           |
|----|---|---------------------------------|----------|----|--------------------------------|---------------------------|
| 28 | 1 | Single subcortical $\geq$ 15 mm | Apixaban | AF | OAC stopped 6 weeks after LAAC | No events for 37.3 months |
| 29 | 1 | CRAO                            | Apixaban | AF | Kept on OAC                    | No events for 14.4 months |

Events are listed in chronological order if the patient had more than one acute ischemic stroke prior to the left atrial appendage closure. AIS, acute ischemic stroke; DWI, diffusion weighted imaging; LAAC, left atrial appendage closure; OAC, oral anticoagulant; AF, atrial fibrillation; ASA, aspirin; cSVD, cerebral small vessel disease; CRAO, central retinal artery occlusion; BRAO, branch artery occlusion; MGUS, monoclonal gammopathy of undetermined significance; DAPT, dual antiplatelet; HFrEF, heart failure with reserved ejection fraction
